# Supplementary material for: Crystal structure and mutational analysis of Mycobacterium smegmatis FenA highlight active site amino acids and three metal ions essential for flap endonuclease and 5′ exonuclease activities
Source: PubMed Central journal article supplement — Nucleic Acids Res. 2018 Apr 9;46(8):4164–75. doi: 10.1093/nar/gky238 (PMC5934675; doi:10.1093/nar/gky238), 2018-04-09
Supplement: gky238_supp.pdf [file gky238_supp.pdf]

Supplemental Material

**Crystal structure and mutational analysis of *Mycobacterium smegmatis* FenA highlight active site amino acids and three metal ions essential for flap endonuclease and 5' exonuclease activities**

Maria Loressa Uson, Ayala Carl, Yehuda Goldgur, and Stewart Shuman

Supplemental Tables S1 and S2

Supplemental Figures S1, S2, S3, and S4

Table S1  
Crystallographic data and refinement statistics

|                                                                     | SeMet-WT                          | D125N                             | D148N                             | D208N                             |
|---------------------------------------------------------------------|-----------------------------------|-----------------------------------|-----------------------------------|-----------------------------------|
| <b>Data collection</b>                                              |                                   |                                   |                                   |                                   |
| Beamline                                                            | APS 24-ID-C                       | APS 24-ID-E                       | APS 24-ID-E                       | APS 24-ID-C                       |
| Space group                                                         | P2 <sub>1</sub>                   | P2 <sub>1</sub>                   | P2 <sub>1</sub>                   | P2 <sub>1</sub>                   |
| Cell dimensions<br>a, b, c (Å)<br>$\alpha$ , $\beta$ , $\gamma$ (°) | 63.1, 39.8, 68.2<br>90, 108.9, 90 | 63.2, 39.9, 68.4<br>90, 108.8, 90 | 63.4, 40.1, 68.4<br>90, 109.1, 90 | 63.2, 39.9, 68.4<br>90, 109.1, 90 |
| Resolution (Å)                                                      | 50–1.8(1.85-1.8)                  | 50–2.2 (2.25–2.2)                 | 50–1.8 (1.85-1.8)                 | 50–1.9 (1.95-1.9)                 |
| Wavelength (Å)                                                      | 0.9791                            | 0.9792                            | 0.9792                            | 0.9791                            |
| R <sub>pim</sub>                                                    | 0.060 (0.447)                     | 0.075 (0.420)                     | 0.031 (0.133)                     | 0.068 (0.378)                     |
| CC(1/2)                                                             | 0.997 (0.600)                     | 0.995 (0.810)                     | 0.995 (0.915)                     | 0.996 (0.620)                     |
| $\langle  I  / \langle \sigma I \rangle$                            | 20.9 (2.0)                        | 5.9 (1.4)                         | 22.2 (3.0)                        | 10.0 (1.5)                        |
| Completeness (%)                                                    | 98.8 (97.4)                       | 99.0 (99.9)                       | 98.0 (87.2)                       | 98.9 (97.1)                       |
| Redundancy                                                          | 5.4 (3.1)                         | 4.1 (4.1)                         | 3.9 (2.8)                         | 4.2 (3.3)                         |
| Unique reflections                                                  | 29804                             | 16681                             | 29647                             | 25196                             |
| <b>Phasing</b>                                                      |                                   |                                   |                                   |                                   |
| HA sites                                                            | 2 Se, 1 Mn                        |                                   |                                   |                                   |
| Figure of merit                                                     | 0.338                             |                                   |                                   |                                   |
| <b>Refinement</b>                                                   |                                   |                                   |                                   |                                   |
| R <sub>work</sub> / R <sub>free</sub>                               | 0.174 / 0.205                     | 0.177 / 0.226                     | 0.157 / 0.193                     | 0.185 / 0.220                     |
| B-factors (Å <sup>2</sup> )<br>Average/Wilson                       | 28.5 / 23.8                       | 37.7 / 31.3                       | 23.9 / 19.1                       | 24.1 / 20.3                       |
| RMS deviations<br>bond lengths (Å)<br>bond angles (°)               | 0.006<br>0.887                    | 0.007<br>0.938                    | 0.006<br>0.903                    | 0.007<br>0.977                    |
| Ramachandran plot<br>% favored<br>% allowed<br>% outliers           | 99.4<br>0.6<br>0                  | 98.1<br>1.6<br>0.3                | 97.8<br>2.2<br>0                  | 98.7<br>1.3<br>0                  |
| <b>Model contents</b>                                               |                                   |                                   |                                   |                                   |
| Protomers / ASU                                                     | 1                                 | 1                                 | 1                                 | 1                                 |
| Protein residues                                                    | 316                               | 316                               | 316                               | 316                               |
| Ions                                                                | 4 Mn                              | 3 Mn                              | 3 Mn                              | 3 Mn, 1 phosphate                 |
| Water                                                               | 271                               | 251                               | 431                               | 292                               |
| <b>PDB ID</b>                                                       | 6C33                              | 6C34                              | 6C35                              | 6C36                              |

Values in parentheses refer to the highest resolution shell.

R<sub>free</sub> set consists of 10% of data chosen randomly against which structures was not refined.

Table S2

## Closest Structural Homologs of FenA

| Protein                              | pdb ID | Z score | root mean square deviation        | % identity |
|--------------------------------------|--------|---------|-----------------------------------|------------|
| <i>Escherichia coli</i> ExoIX        | 3ZDD   | 25.1    | 2.0 Å at 243 C $\alpha$ positions | 25         |
| Taq Polymerase                       | 1TAU   | 23.1    | 3.1 Å at 254 C $\alpha$ positions | 26         |
| T5 Fen                               | 1EXN   | 22.5    | 2.7 Å at 242 C $\alpha$ positions | 21         |
| <i>Methanopyrus kandleri</i> FEN1    | 4WA8   | 18.7    | 3.3 Å at 251 C $\alpha$ positions | 20         |
| <i>Archaeoglobus fulgidus</i> FEN1   | 1RXV   | 18.3    | 3.9 Å at 254 C $\alpha$ positions | 17         |
| T4 Fen (RNaseH)                      | 2IHN   | 18.2    | 3.1 Å at 247 C $\alpha$ positions | 16         |
| <i>Methanococcus jannaschii</i> FEN1 | 1A77   | 17.6    | 3.9 Å at 253 C $\alpha$ positions | 18         |
| Human FEN1                           | 3Q8M   | 17.5    | 4.3 Å at 264 C $\alpha$ positions | 16         |
| <i>Pyrococcus furiosus</i> FEN1      | 1B43   | 17.2    | 3.5 Å at 249 C $\alpha$ positions | 16         |
| <i>Sulfolobus solfataricus</i> FEN1  | 2IZO   | 15.9    | 3.2 Å at 217 C $\alpha$ positions | 18         |
| <i>Saccharomyces cerevisiae</i> Rad2 | 4Q0Z   | 15.9    | 4.2 Å at 250 C $\alpha$ positions | 18         |
| Human GEN1                           | 5T9J   | 15.5    | 3.4 Å at 253 C $\alpha$ positions | 15         |
| Human Exol                           | 5V0D   | 13.6    | 3.7 Å at 227 C $\alpha$ positions | 13         |
| <i>Caenorhabditis elegans</i> XRN2   | 5FIR   | 10.7    | 4.3 Å at 247 C $\alpha$ positions | 11         |

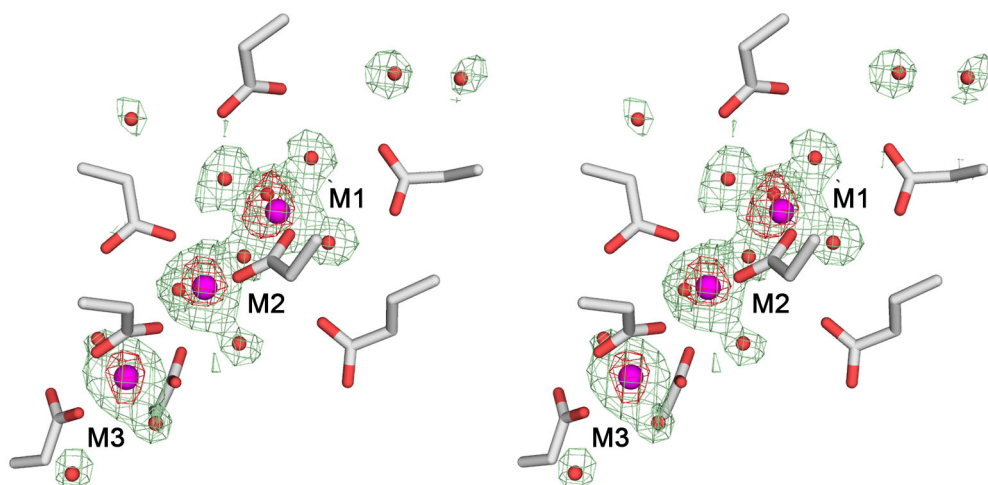

Figure S1. Stereo view of a simulated annealing Fo-Fc omit map (green mesh contoured at  $3\sigma$ ) and an anomalous difference map (red mesh contoured at  $4\sigma$ ) affirm the presence of three manganese ions (M1, M2, and M3, magenta spheres) in the wild-type FenA active site. Waters are depicted as red spheres. The eight conserved acidic side chains that engage the metal ions are shown as stick models.

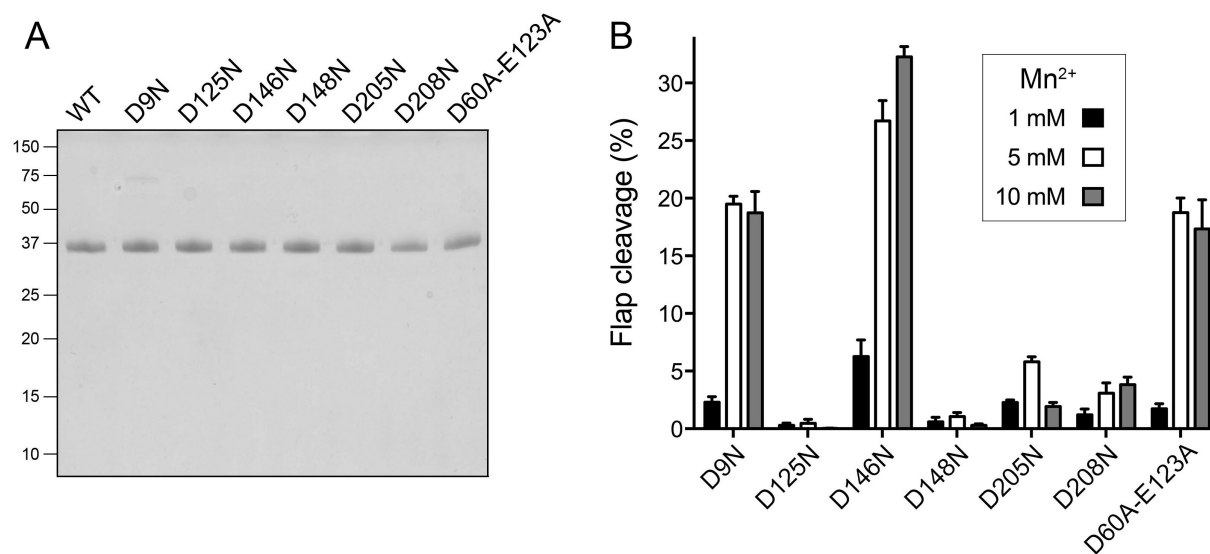

Figure S2. FenA Asp-to-Asn mutants and tests of rescue by increasing manganese concentration. (A) Aliquots (5  $\mu$ g) of the preparations of wild-type (WT) FenA and the indicated Asp-to-Asn mutants as well as the D60A-E123A double-alanine mutant were analyzed by SDS-PAGE. The Coomassie blue-stained gel is shown. The positions and sizes (in kilodaltons) of marker polypeptides are indicated on the left. (B) Reaction mixtures (10  $\mu$ l) containing 20 mM Tris-HCl, pH 8.0, 50 mM NaCl, 1, 5 or 10 mM MnCl<sub>2</sub> as specified, 1 mM DTT, 1 pmol (100 nM) <sup>32</sup>P-labeled flap-nick substrate, and 10 pmol (1  $\mu$ M) FenA mutant were incubated for 30 min at 37°C. The extents of flap cleavage by each mutant are plotted in bar graph format as a function of increasing manganese concentration. Each datum is the average of three separate experiments  $\pm$ SEM.

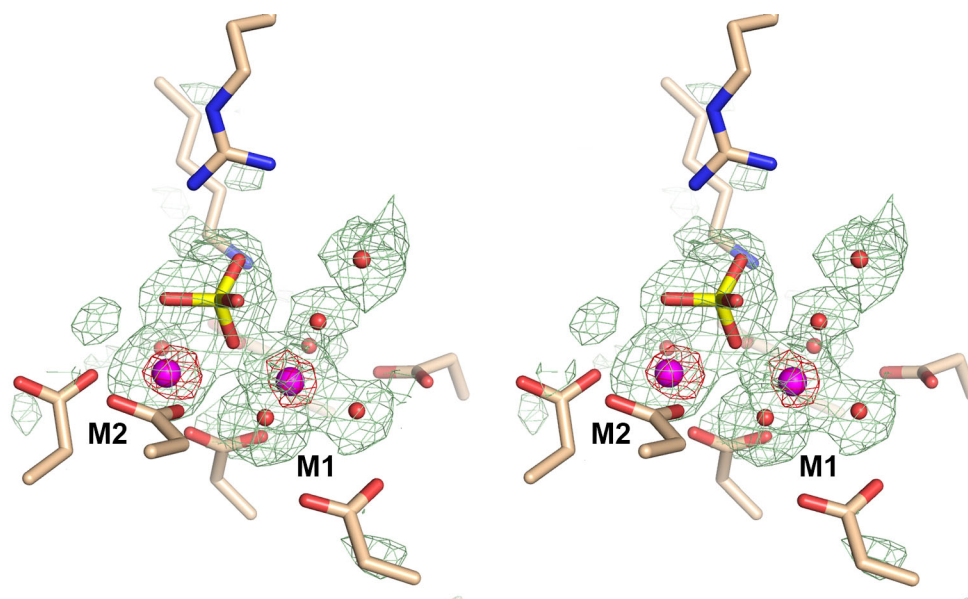

Figure S3. Stereo view of a simulated annealing Fo-Fc omit map (green mesh contoured at  $2.5\sigma$ ) and an anomalous difference map (red mesh contoured at  $4\sigma$ ) of the D208N active site in the region surrounding the M1 and M2 manganese ions (magenta spheres). A tetrahedron-shaped density between M1 and M2 is modeled as a phosphate anion. Waters are depicted as red spheres. Amino acid side chains are shown as stick models with beige carbons.

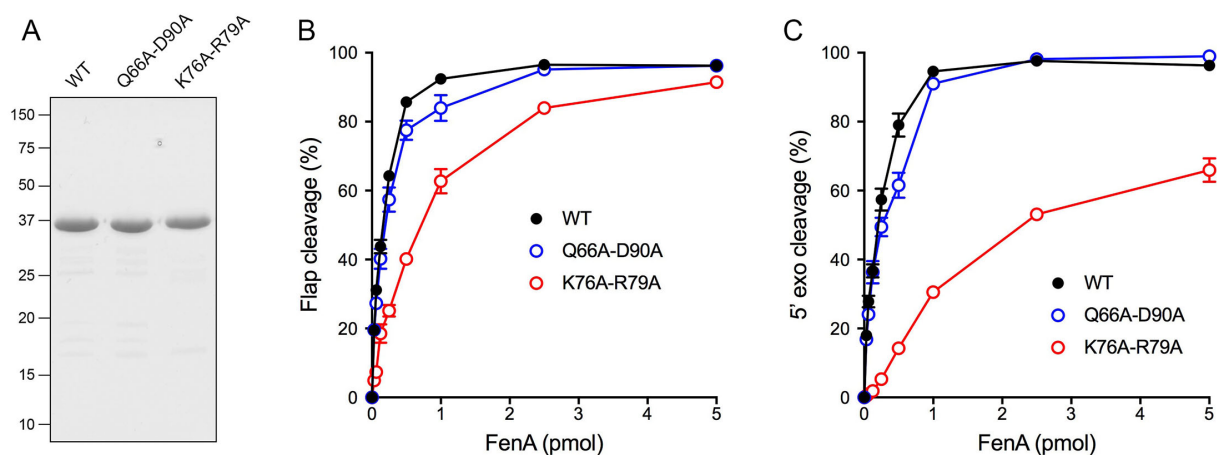

Figure S4. Effect of mutations of phosphate-binding and M4-binding amino acids on FenA activity. (A) Aliquots (5  $\mu$ g) of the preparations of wild-type (WT) FenA and the indicated double-alanine mutants were analyzed by SDS-PAGE. The Coomassie blue-stained gel is shown. The positions and sizes (in kilodaltons) of marker polypeptides are indicated on the left. (B and C) Mutational effects on flap endonuclease (B) and 5' exonuclease activity (C). Reaction mixtures (10  $\mu$ l) containing 20 mM Tris-HCl, pH 8.0, 50 mM NaCl, 1 mM MnCl<sub>2</sub>, 1 mM DTT, and 1 pmol (100 nM) of either <sup>32</sup>P-labeled 10-mer flap-nicked duplex DNA (panel B) or <sup>32</sup>P-labeled nicked duplex DNA (panel C), and increasing amounts of wild-type (WT) or mutant FenA were incubated for 30 min at 37°C. The reaction products were analyzed by urea-PAGE and visualized and quantified by scanning the gel with a phosphorimager. The extents of cleavage of the substrates are plotted as a function of input FenA. Each datum is the average of three independent titration experiments  $\pm$  SEM.
